# Supplementary material
Source: PubMed Central journal article supplement (PMC4737727)

## Supplementary information

### Material and methods

#### Transmission electron microscopy

Cells were incubated at a density of 80,000 cells/cm<sup>2</sup> and allowed to grow for 18 hours. The cells were incubated with 0.6 mg/L with AGuIX® for 1 hour. Afterwards, cells were fixed with 0.2 M sodium cacodylate buffer and 4 % glutaraldehyde 1:1 for 15 minutes at 37°C. Then, the cells were washed with 0.2 M cacodylate. Thin sections of approximately 70 nm were prepared with a Reichert Ultracut E ultramicrotome. The sections were observed using a Philips CM 120 electron microscope operating at 80 kV.

**Figure S1. Cellular uptake of AGuIX® in B16F10 cells.** (a-c) TEM images of B16F10 cells in the control condition (a) or 1 hour after incubation with 0.6 g/L AGuIX® (b-c). Some aggregates are visible in close vicinity to the cell membrane (b) and internalized in vesicles (c).

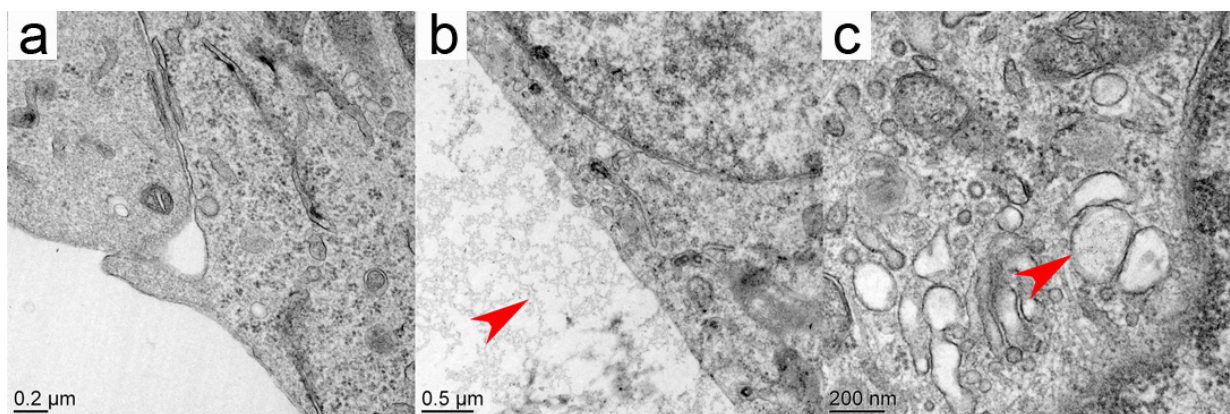

Supplement: thnov06p0418s1.pdf [file thnov06p0418s1.pdf]
